# Supplementary material
Source: publisher figshare collection journal article supplement (https://gsajournals.figshare.com/articles/dataset/_/14689173)

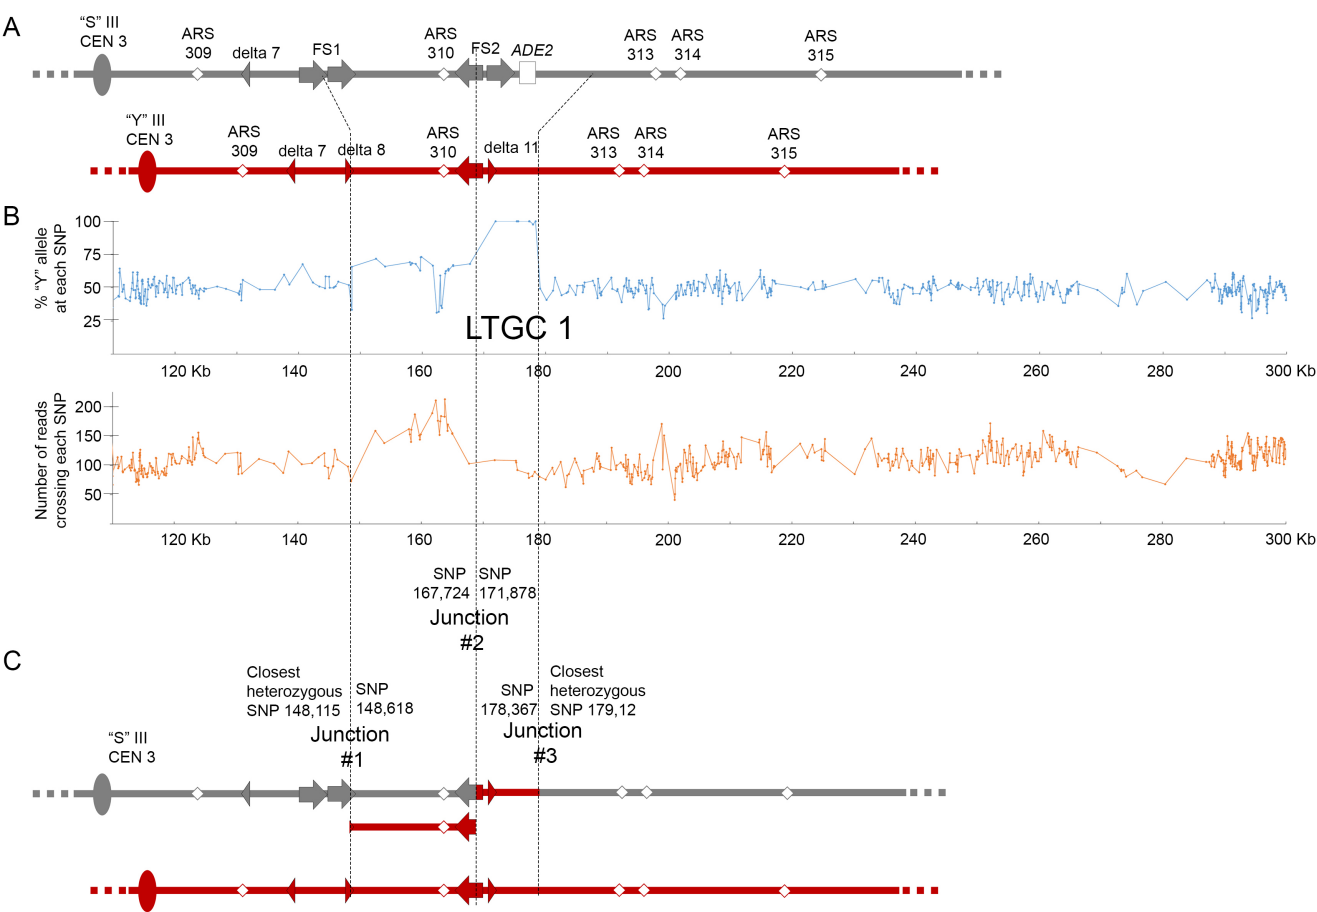

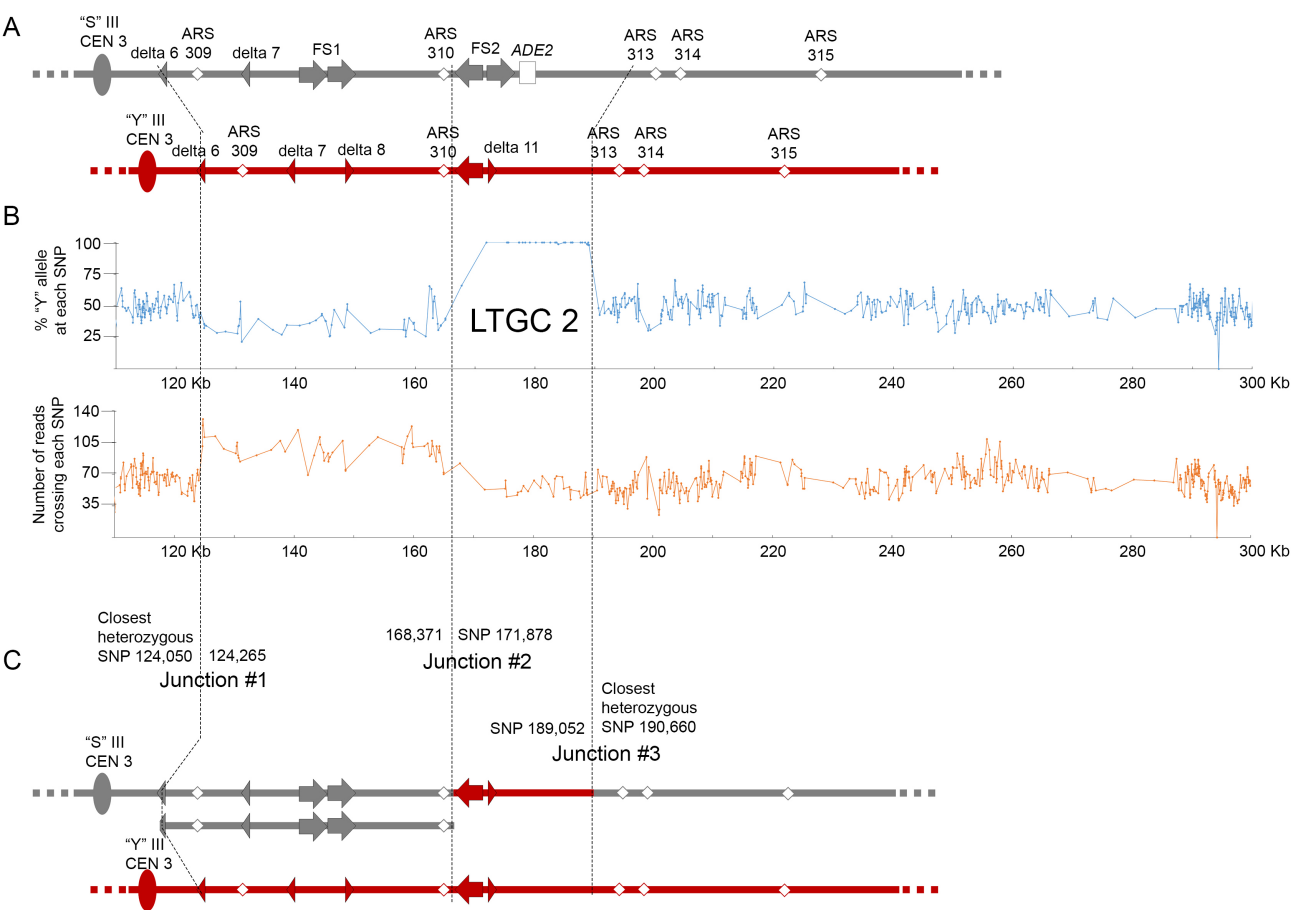

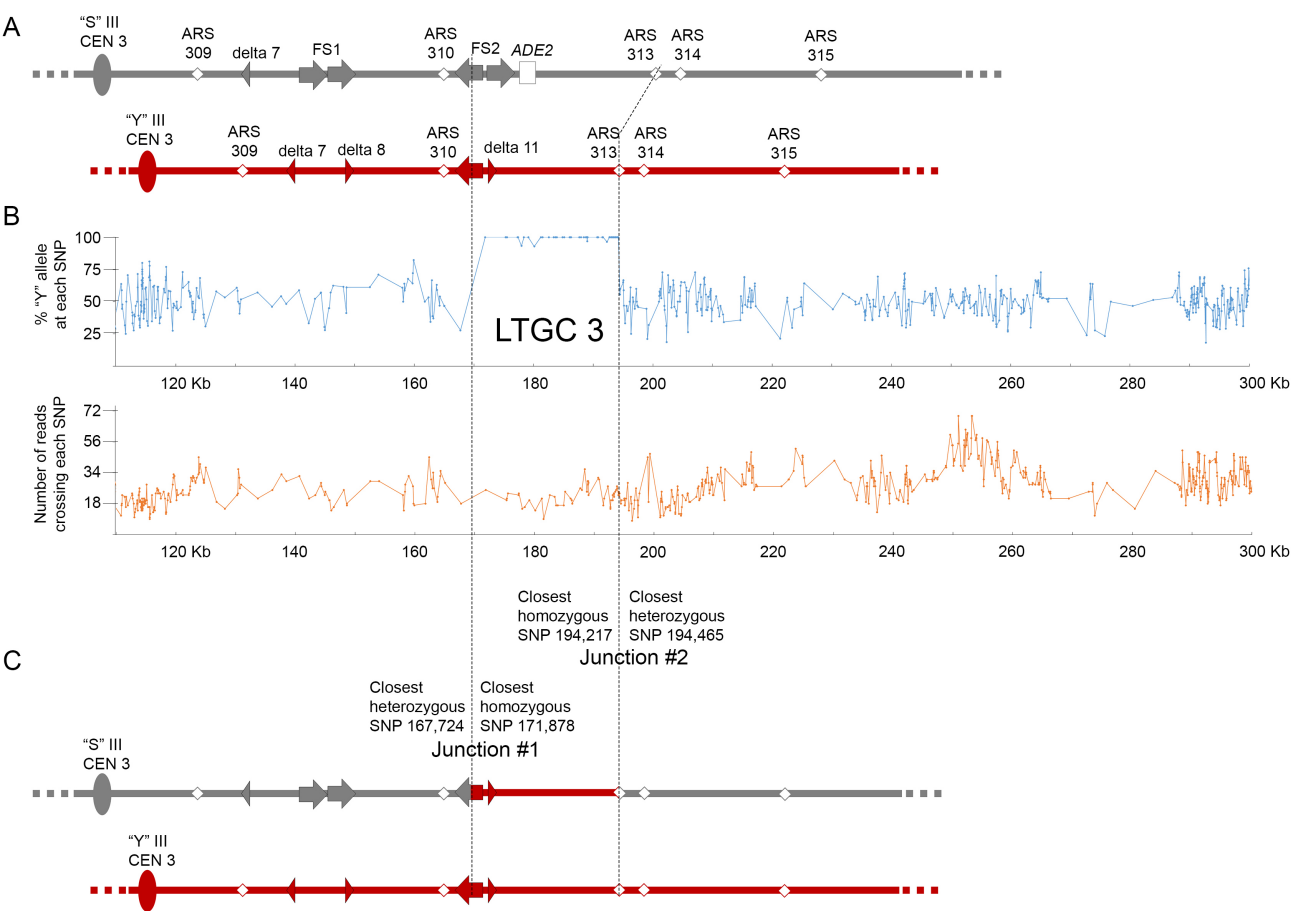

A

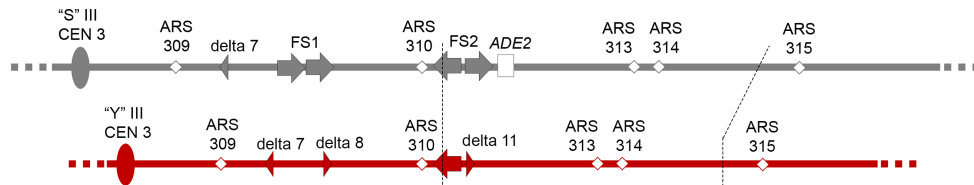

B

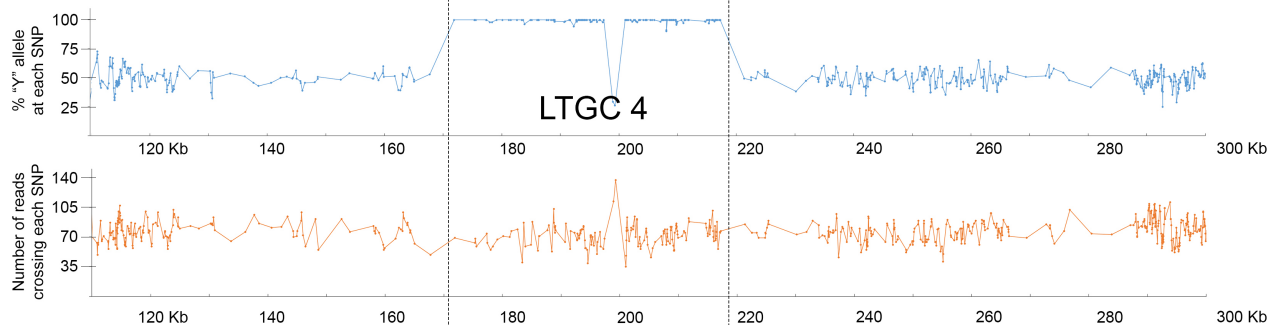

C

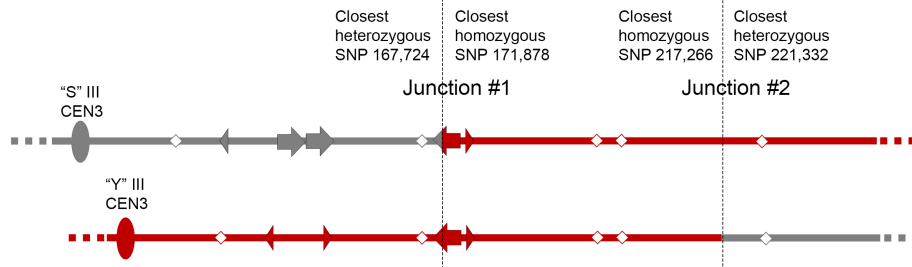



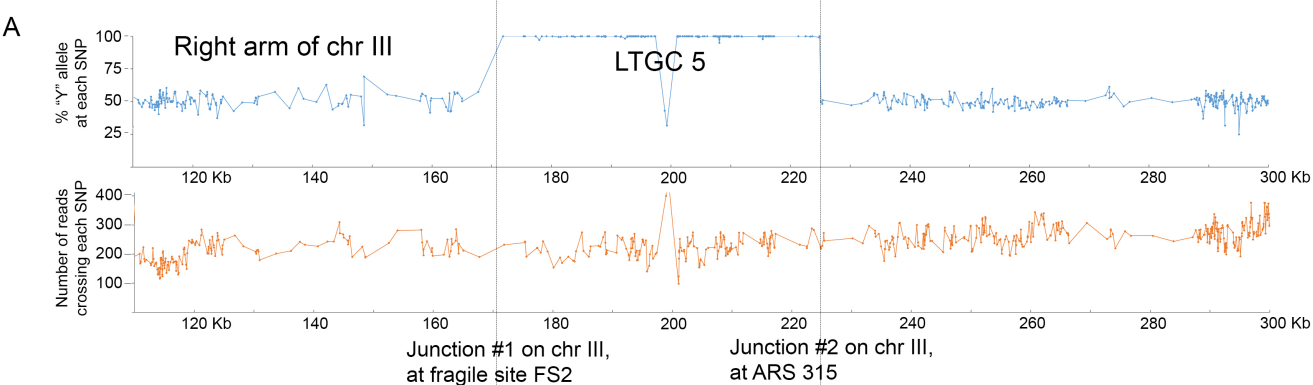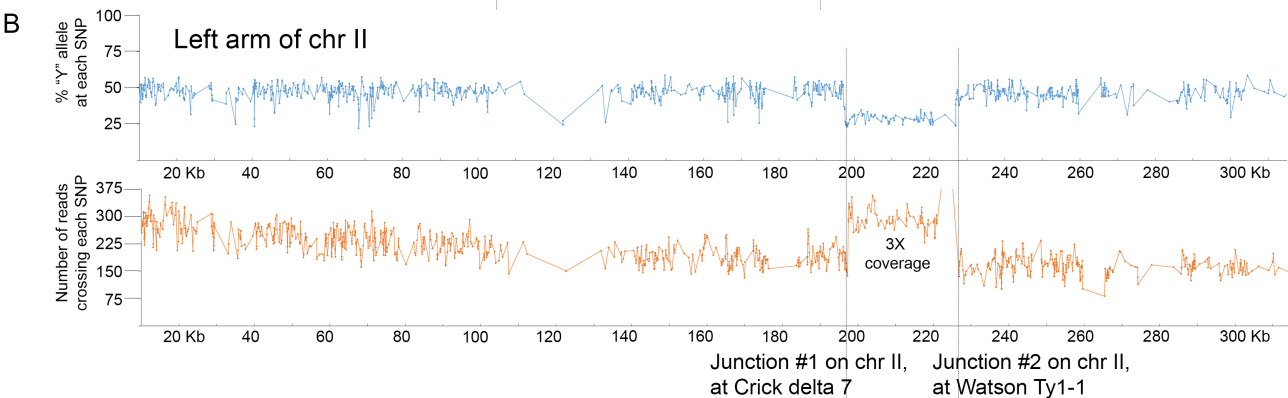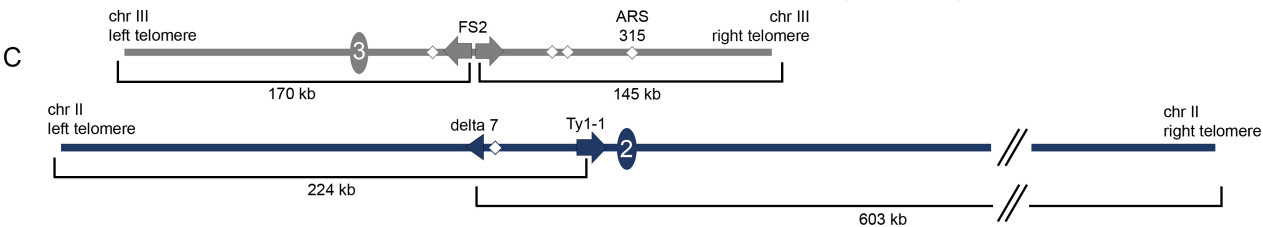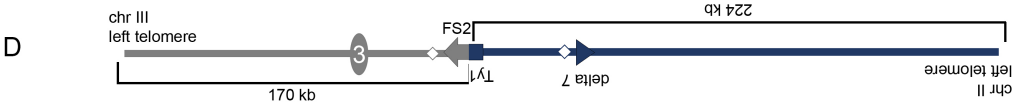

A

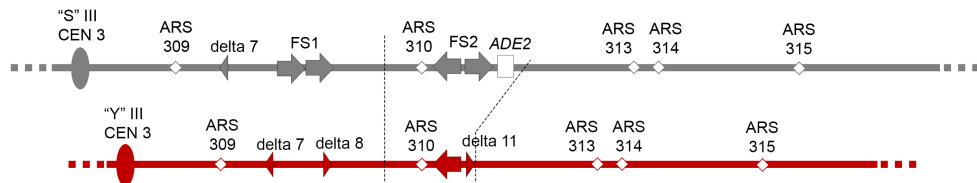

B

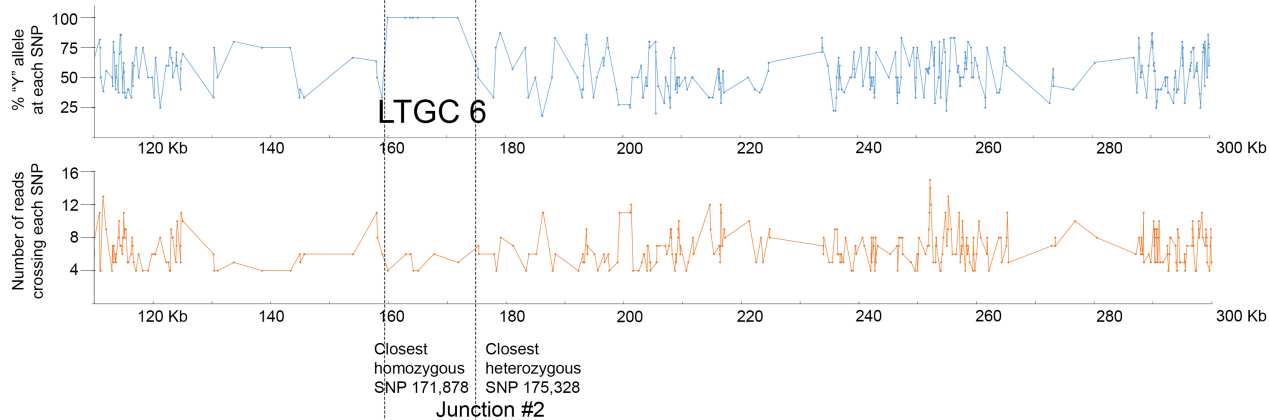

C

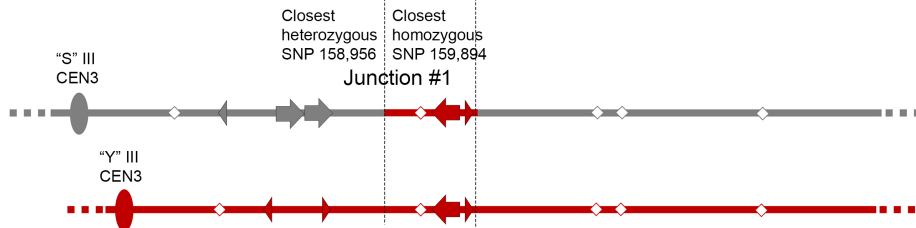

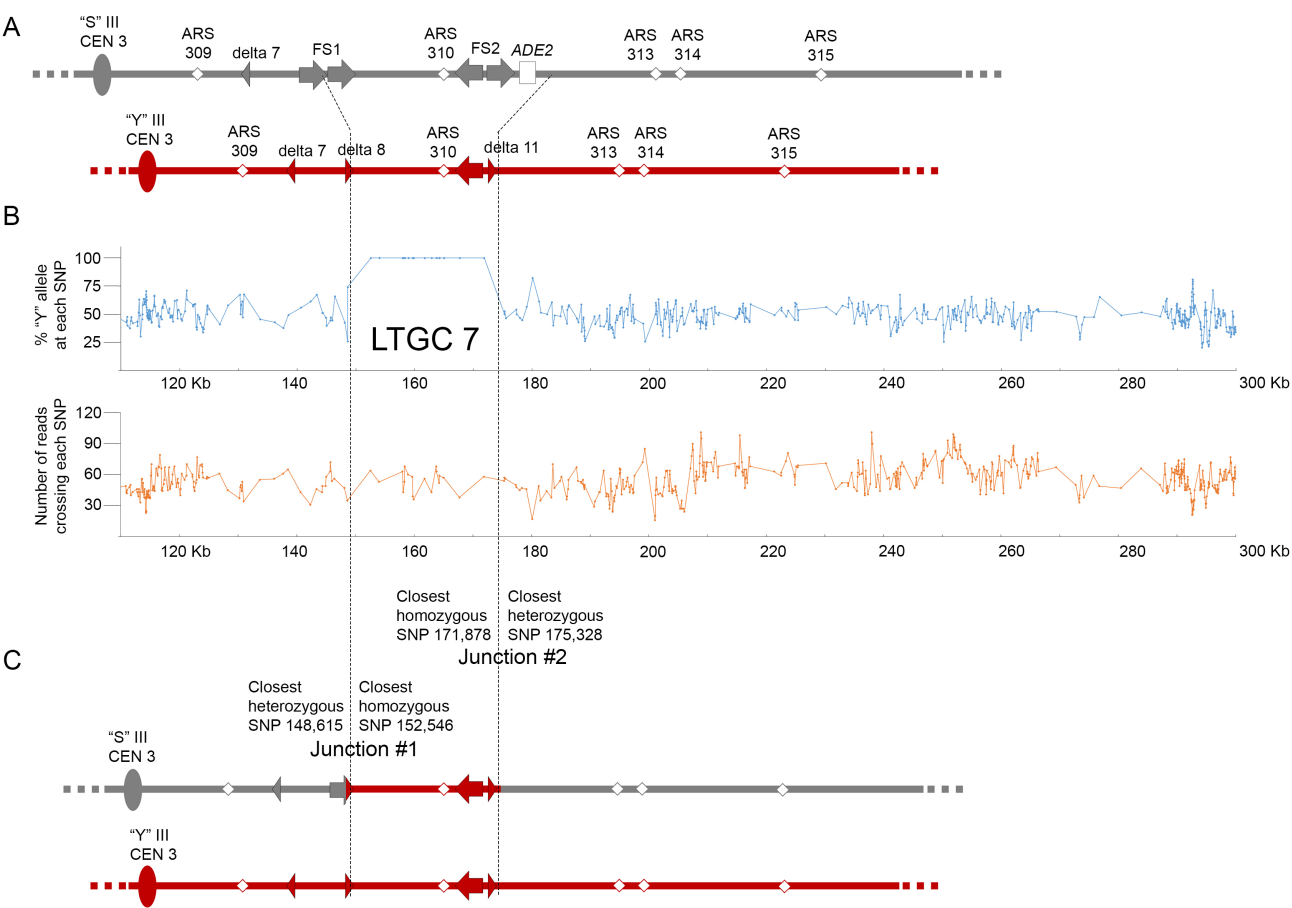

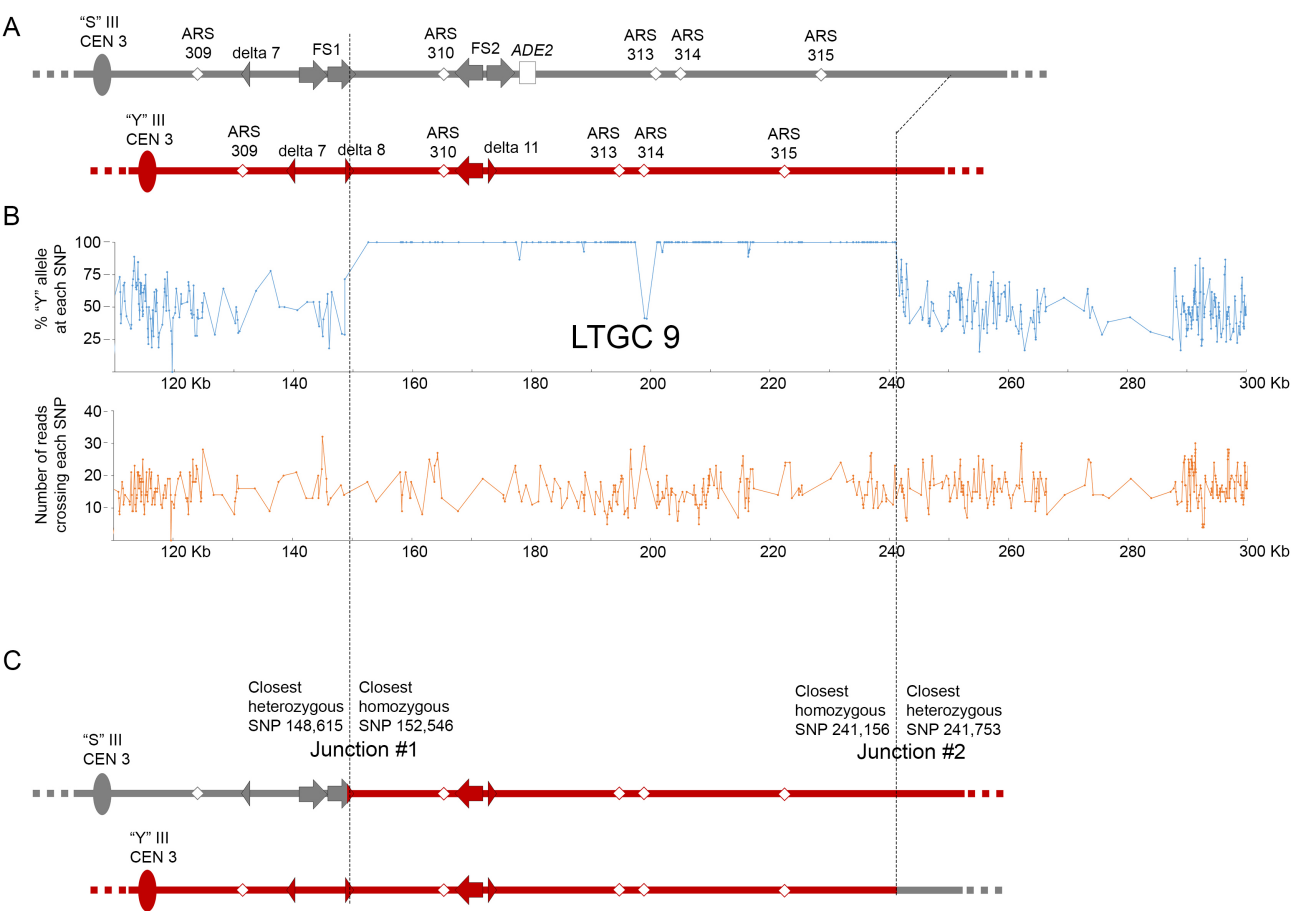

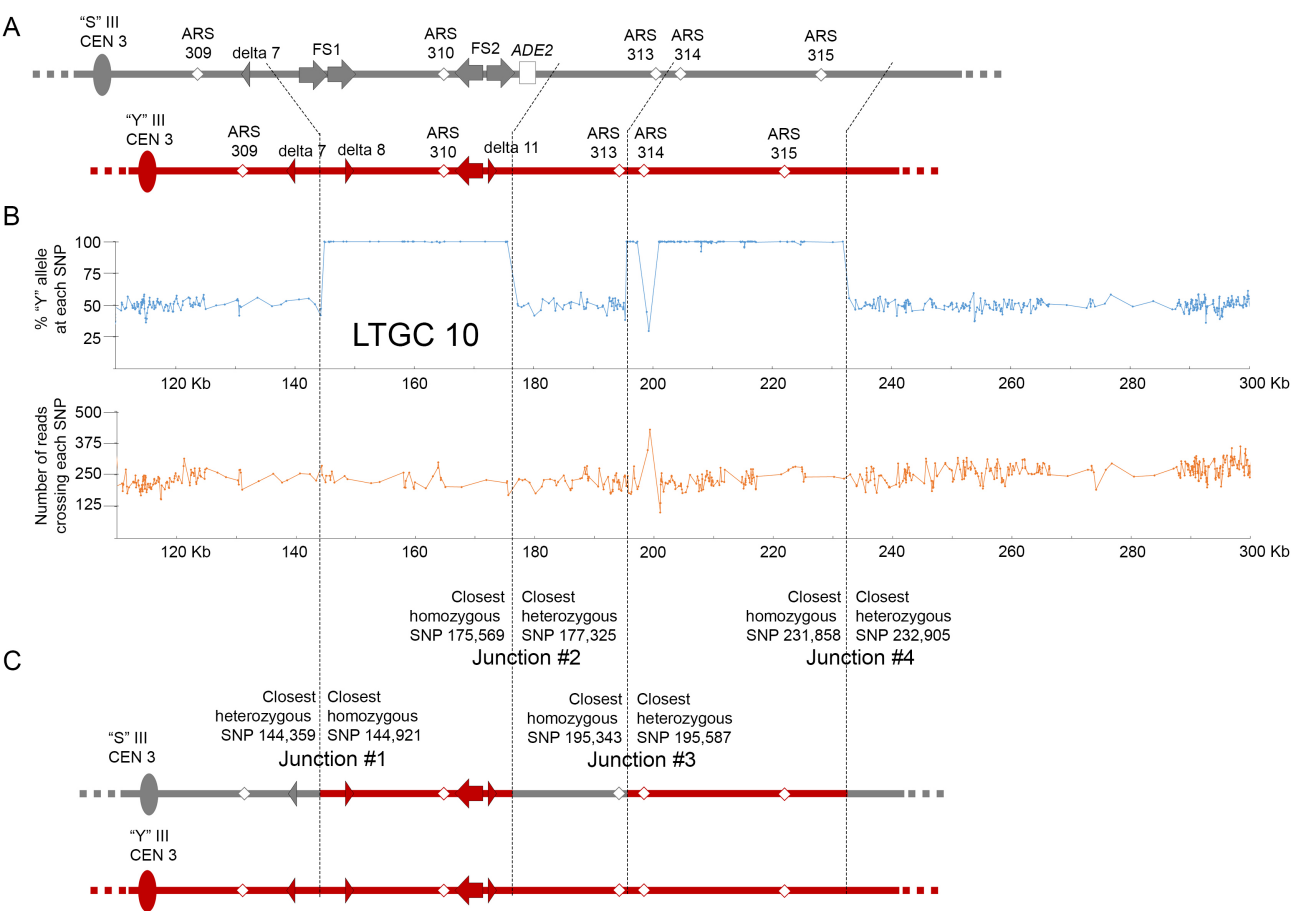

A

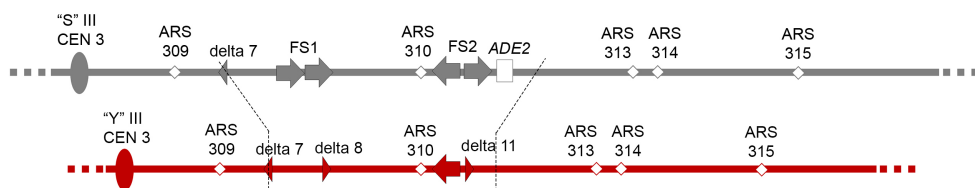

B

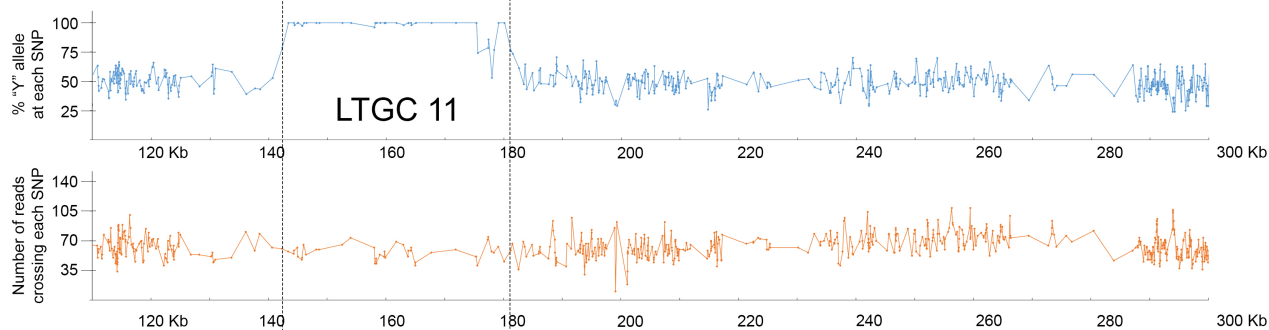

C

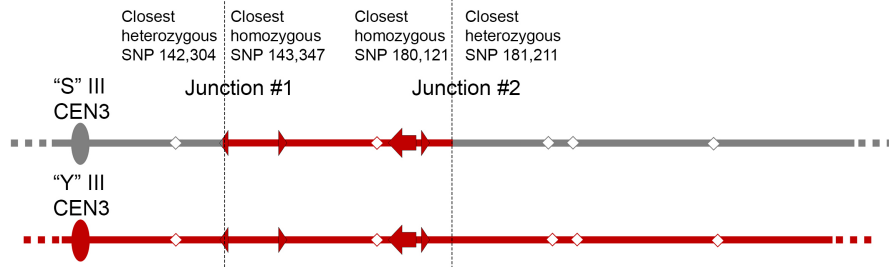

A

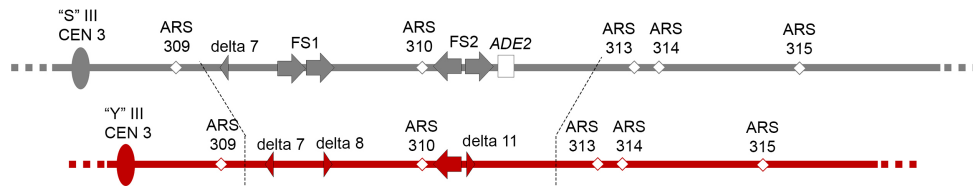

B

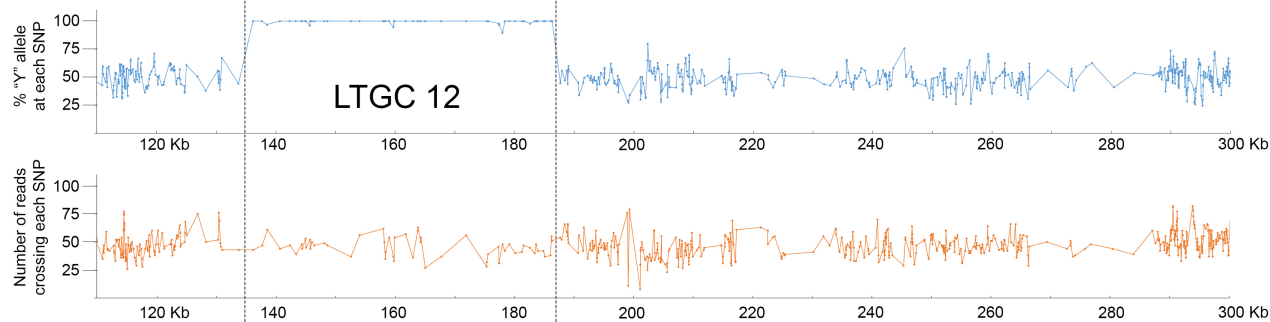

C

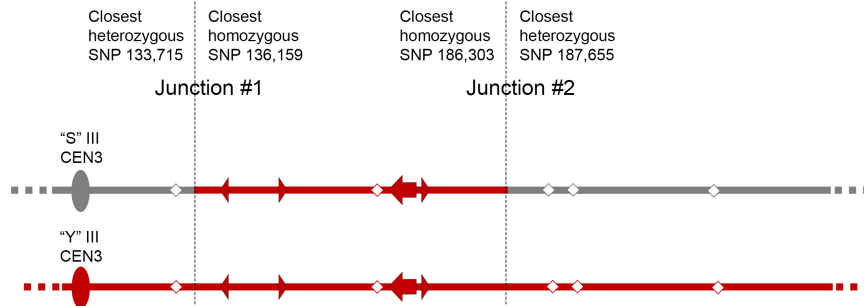

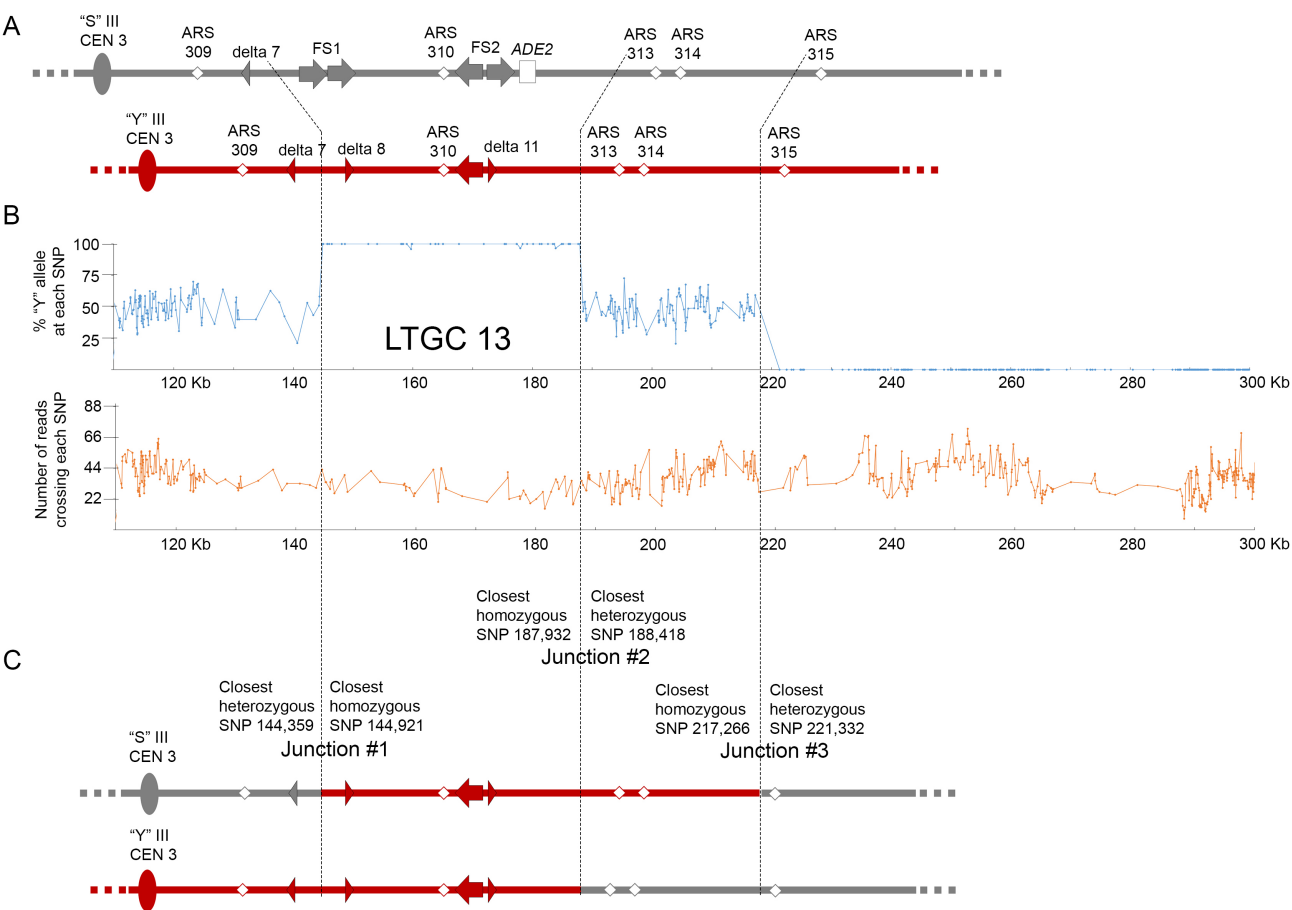



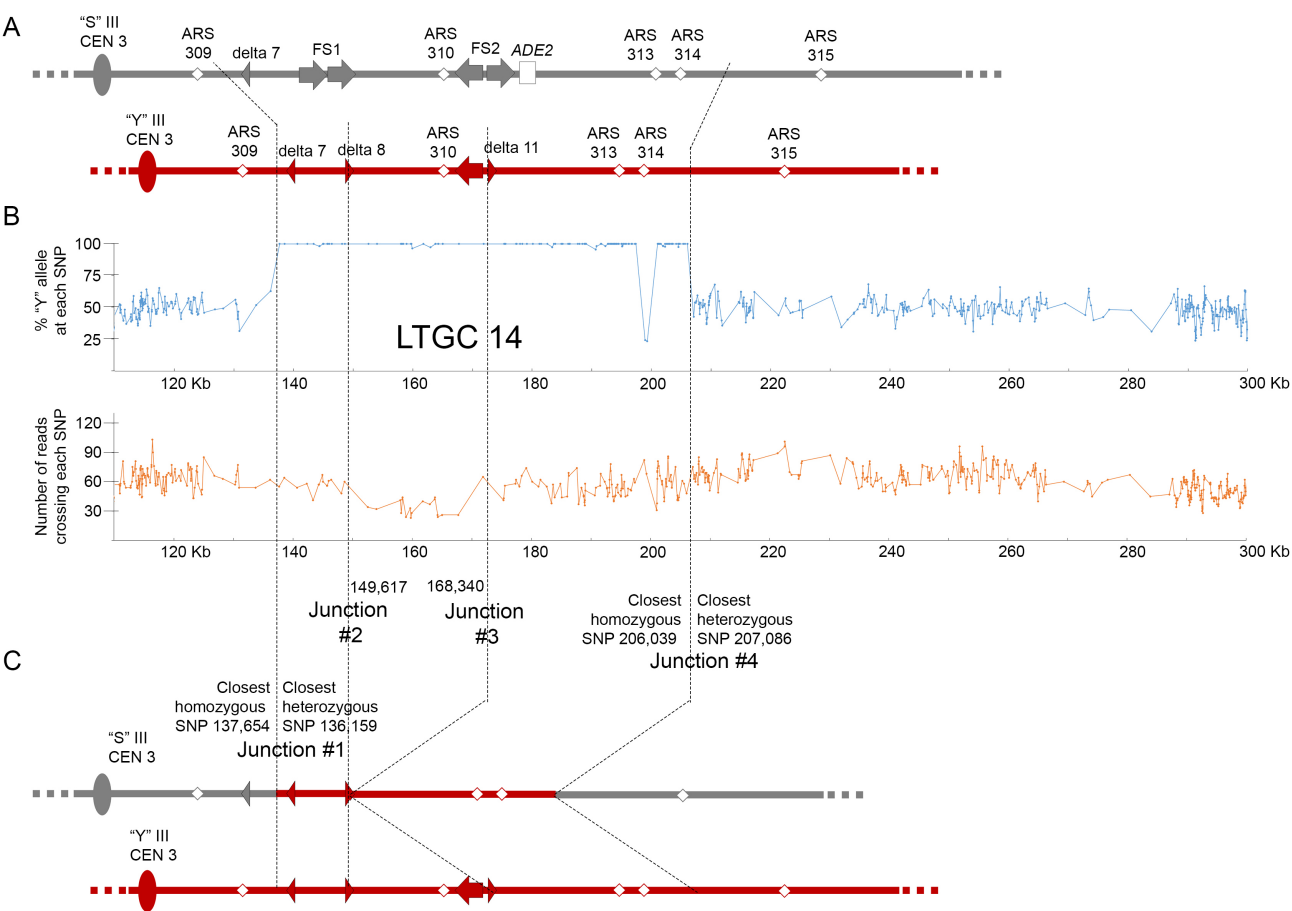

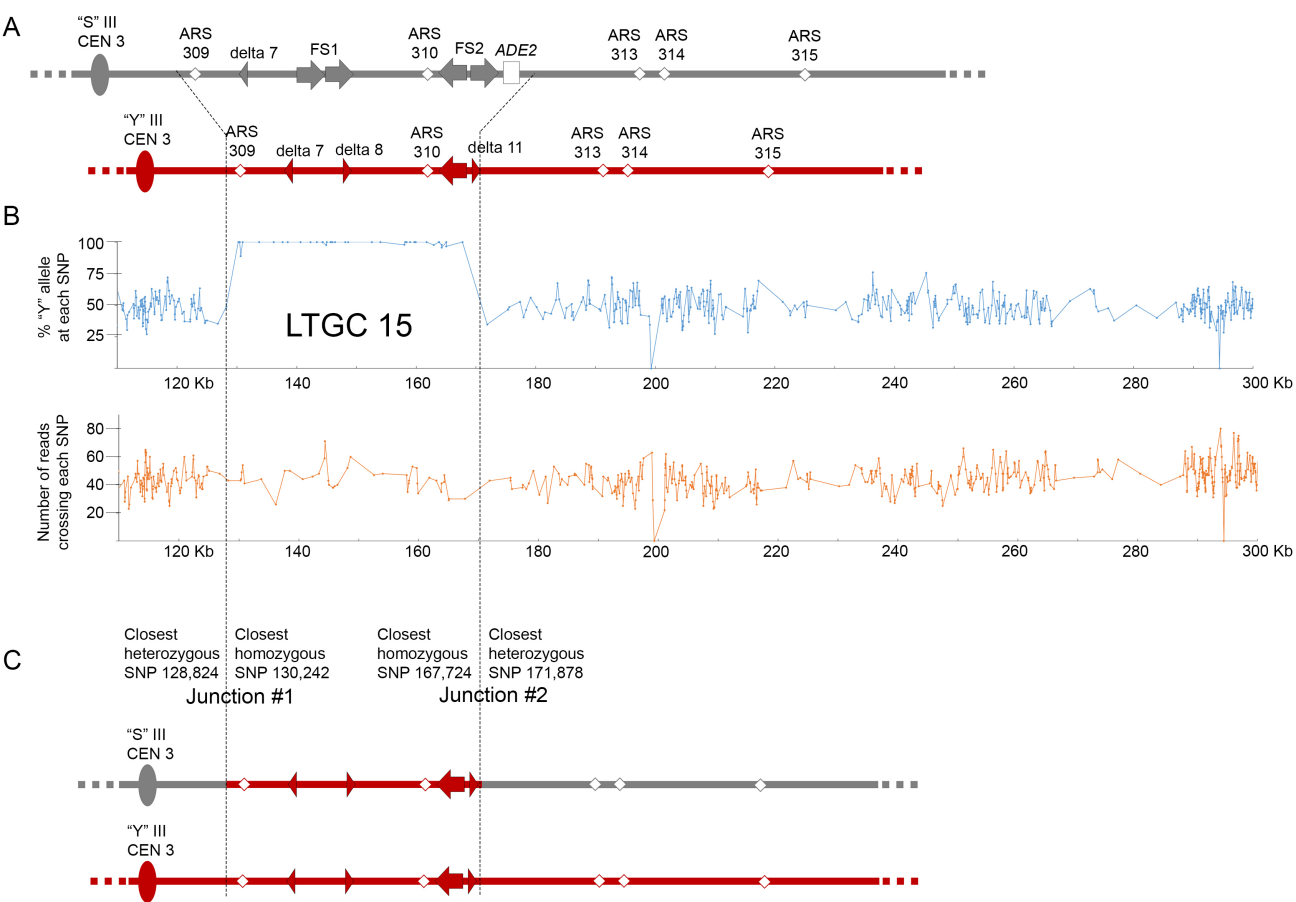

Supplement: Supplementary file 1 [file 1]
